# Supplementary material for: Small Molecules of Natural Origin as Potential Anti-HIV Agents: A Computational Approach
Source: MDPI journal article supplement (doi:10.3390/life11070722), 2021-07-20
Supplement: s1 [file s1]

# Small molecules of natural origin as potential Anti-HIV agents: a computational approach

Luminita Crisan <sup>1,\*</sup> and AlinaBora <sup>1,\*</sup>

<sup>1</sup> "Coriolan Dragulescu" Institute of Chemistry, 24 M. Viteazu Ave, 300223 Timisoara, Romania; lumi\_crisan@acad-icht.tm.edu.ro (L.C.); alina\_bora@acad-icht.tm.edu.ro (A.B.)

\* Correspondence: [alina\\_bora@acad-icht.tm.edu.ro](mailto:alina_bora@acad-icht.tm.edu.ro); [lumi\\_crisan@acad-icht.tm.edu.ro](mailto:lumi_crisan@acad-icht.tm.edu.ro)

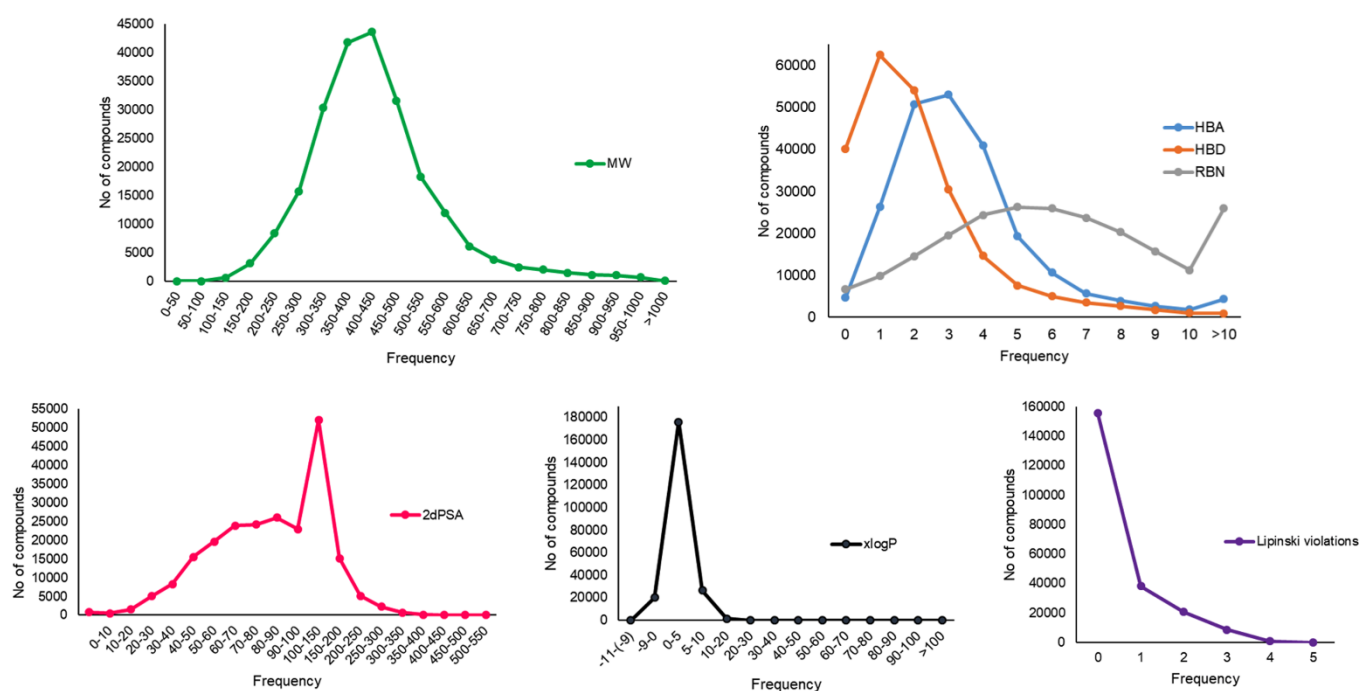

Figure S1. Distribution of drug-like properties for ZINC15 NPs subset.

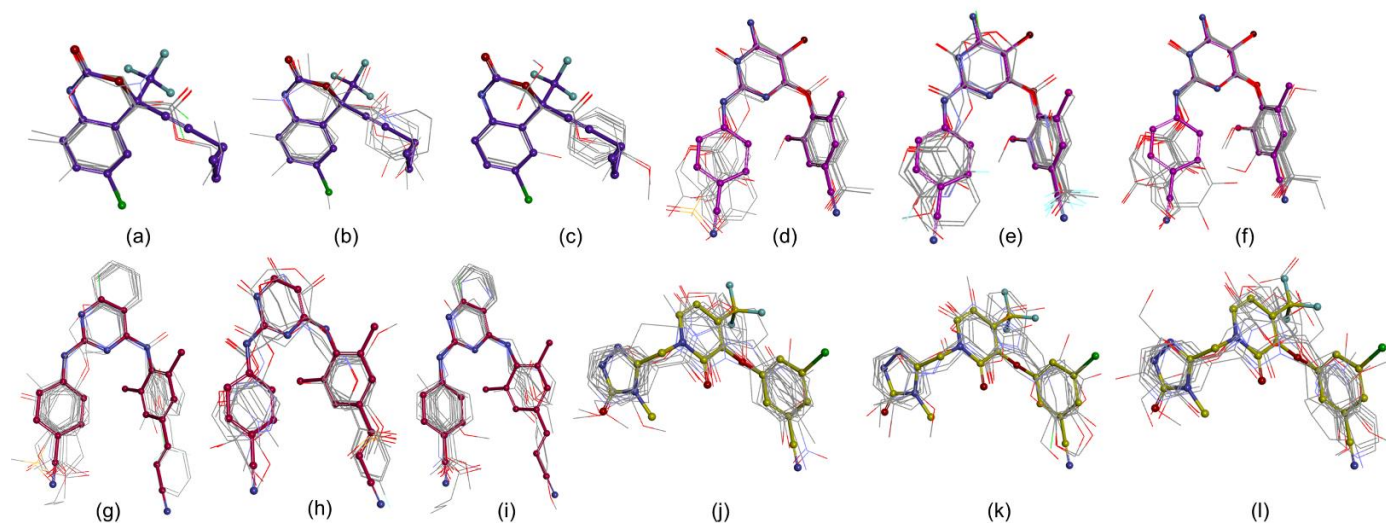

**Figure S2.** The first ten aligned molecules with ROCS: Efavirenz - TanimotoCombo values criteria (a), ShapeTanimoto values (b), TanimotoCombo values (c); Etravirine - TanimotoCombo values criteria (d), ShapeTanimoto values (e), TanimotoCombo values (f); Rilpivirine - TanimotoCombo values criteria (g), ShapeTanimoto values (h), TanimotoCombo values (i); Doravirine - TanimotoCombo values criteria (j), ShapeTanimoto values (k), TanimotoCombo values (l)

**Table S1.** The best NPs 3D-similarity coefficients vs efavirenz (EFV), etravirine (ETV), rilpivirine (RPV), and doravirine (DOR); 2D structures of queries molecules and selected NPs (TC (Tanimoto Combo) >1, ShT (Shape Tanimoto) >0.8 and CS (Combo Score) >1.2)

| Name                                                                    | 2D-Structures | Name                                                                   | 2D-Structures |
|-------------------------------------------------------------------------|---------------|------------------------------------------------------------------------|---------------|
| Etravirine                                                              |               | Rilpivirine                                                            |               |
| BMF-1                                                                   |               | BMF-1                                                                  |               |
| Efavirenz                                                               |               | Doravirine                                                             |               |
| BMF-2                                                                   |               | BMF-3                                                                  |               |
| ZINC142491991<br>Query – ETV<br>TC = 1.154<br>ShT = 0.844<br>CS = 1.403 |               | ZINC142492210<br>Query – ETV<br>TC = 1.13<br>ShT = 0.825<br>CS = 1.384 |               |
| BMF-4                                                                   |               | BMF-4                                                                  |               |
| ZINC37538901<br>Query – ETV<br>TC = 1.089<br>ShT = 0.800<br>CS = 1.390  |               | ZINC95911489<br>Query – ETV<br>TC = 1.076<br>ShT = 0.805<br>TC = 1.348 |               |
| BMF-4                                                                   |               | BMF-4                                                                  |               |
| ZINC33975071<br>Query – ETV<br>TC = 1.147<br>ShT = 0.834<br>CS = 1.528  |               | ZINC96023826<br>Query – ETV<br>TC = 1.104<br>ShT = 0.811<br>CS = 1.450 |               |

BMF-5

ZINC38321654

Query – ETV

TC = 1.096

ShT = 0.813

CS = 1.475

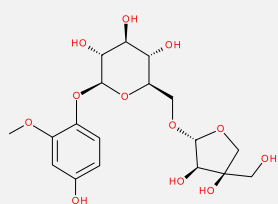

BMF-5

ZINC238760037

Query – ETV

TC = 1.116

ShT = 0.806

CS = 1.495

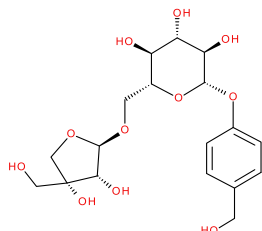

BMF-5

ZINC96113204  
Query – RPV / ETV  
TC = 1.061 / 1.086  
ShT = 0.801 / 0.814  
CS = 1.214 / 1.203

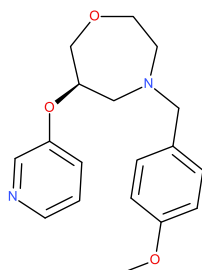

BMF-6

ZINC96269030

Query – ETV

TC = 1.153

ShT = 0.810

CS = 1.274

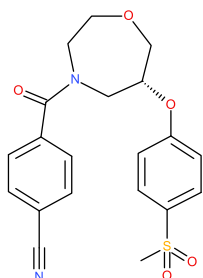

BMF-6

ZINC72320065

Query – ETV

TC = 1.094

ShT = 0.806

CS = 1.457

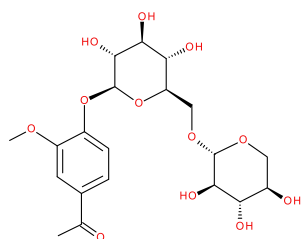

BMF-7

ZINC95911423

Query – ETV

TC = 1.064

ShT = 0.802

CS = 1.406

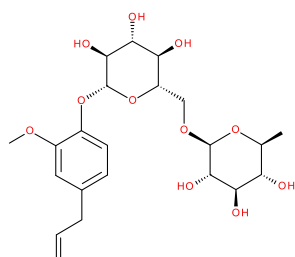

BMF-7

BMF-5

ZINC38321675

Query – ETV

TC = 1.077

ShT = 0.809

CS = 1.404

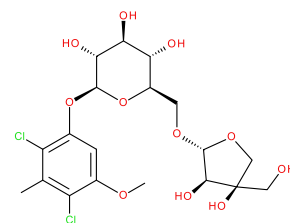

BMF-5

ZINC70455365

Query – ETV

TC = 1.104

ShT = 0.808

CS = 1.492

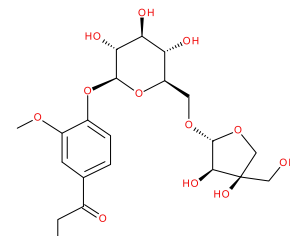

BMF-5

ZINC77265897

Query – RPV

TC = 1.045

ShT = 0.801

CS = 1.215

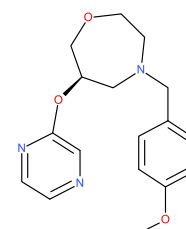

BMF-6

ZINC96113160

Query – ETV

TC = 1.095

ShT = 0.824

CS = 1.211

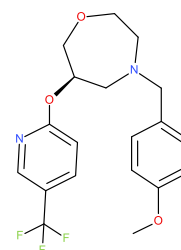

BMF-6

ZINC67912677

Query – ETV

TC = 1.080

ShT = 0.814

CS = 1.425

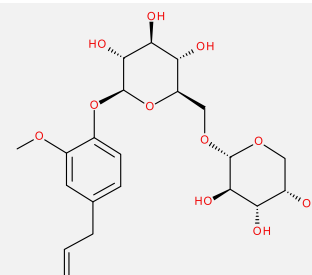

BMF-7

ZINC976902

Query – RPV

TC = 1.074

ShT = 0.801

TC = 1.209

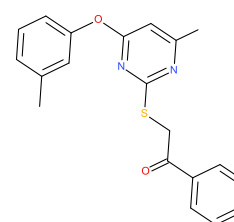

BMF-8

ZINC40879757

Query – ETV

TC = 1.118

ShT = 0.823

CS = 1.383

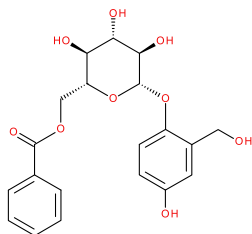

BMF-9

ZINC95486141

Query – ETV

TC = 1.011

ShT = 0.813

CS = 1.293

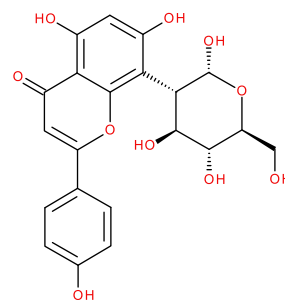

BMF-10

ZINC2103242

Query – DOR

TC = 1.078

ShT = 0.839

TC = 1.247

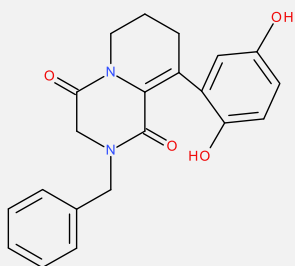

BMF-11

ZINC514290392

Query – DOR

TC = 1.035

ShT = 0.813

TC = 1.277

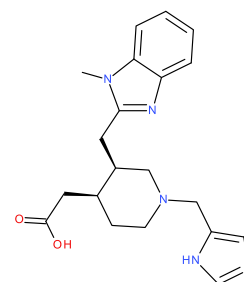

BMF-12

ZINC4340567

Query – EFV

TC = 1.163

ShT = 0.790

CS = 1.537

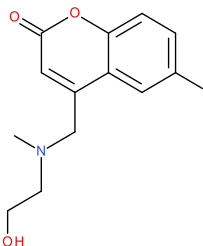

BMF-13

ZINC771797

Query – EFV

TC = 1.141

ShT = 0.789

CS = 1.506

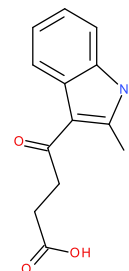

BMF-14

The fourteen distinct scaffolds of twenty selected NPs, as illustrated by BMFs (Table S2), were generated using the InstantJchem tool [1]. The BMF enables to group structures based on the included frameworks such as individual or condensed rings and atoms that connect them, without substituents. A significant rate of scaffolds (Tables S1 and S2) were observed for all predicted NPs even if they were selected using the same template. Again, we emphasize the scaffold hopping abilities of 3D-similarity search with ROCS, which is capable to provide significant structural heterogeneity [2,3].

#### References:

1. InstantJchem 20.15.0, 2020, ChemAxon, <http://www.chemaxon.com>
2. Pacureanu, L.; Avram, S.; Bora, A.; Kurunczi, L.; Crisan L. Portraying the selectivity of GSK-3 inhibitors towards CDK-2 by 3D similarity and molecular docking. *Struct. Chem.* **2019**, *30*, 911–923. doi.org/10.1007/s11224-018-1224-z.
3. ROCS v. 3.2.1.4, OpenEye Scientific Software, Santa Fe, NM., [www.eyesopen.com](http://www.eyesopen.com)

**Table S2.** Unique BMFs of queries molecules and selected NPs

| Name   | 2D-Structures                                                                       | Name   | 2D-Structures                                                                         |
|--------|-------------------------------------------------------------------------------------|--------|---------------------------------------------------------------------------------------|
| BMF-1  | 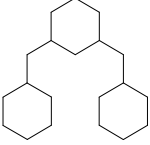   | BMF-2  |    |
| BMF-3  |    | BMF-4  |    |
| BMF-5  |    | BMF-6  |    |
| BMF-7  |    | BMF-8  |   |
| BMF-9  |  | BMF-10 |  |
| BMF-11 |  | BMF-12 |  |
| BMF-13 |  | BMF-14 |  |

**Table S3.** Physicochemical properties, lipophilicity, druglikeness and medicinal chemistry parameters<sup>†</sup> for selected NPs and drugs calculated with Swiss ADME and pkCSM<sup>\*</sup>

| Molecule      | Swiss ADME |     |     |     |        |       |        |       |       |                         | pkCSM            |        |        |
|---------------|------------|-----|-----|-----|--------|-------|--------|-------|-------|-------------------------|------------------|--------|--------|
|               | MW         | RBN | HBA | HBD | TPSA   | iLOGP | XLOGP3 | WLOGP | MLOGP | Lipinski<br>#violations | PAINS<br>#alerts | LOGP   | PSA    |
| ZINC4340567   | 247.29     | 18  | 4   | 4   | 53.68  | 2.41  | 0.98   | 1.37  | 1.33  | 0                       | 0                | 1.526  | 105.45 |
| ZINC771797    | 231.25     | 17  | 4   | 3   | 70.16  | 1.37  | 1.56   | 2.52  | 1.03  | 0                       | 0                | 2.524  | 8      |
| ZINC142491991 | 356.37     | 7   | 8   | 4   | 125.68 | 1.63  | 0.07   | 0.17  | -0.27 | 0                       | 0                | 0.168  | 145.11 |
| ZINC33975071  | 460.43     | 8   | 12  | 6   | 184.60 | 2.76  | -2.36  | -2.46 | -3.04 | 2                       | 0                | -2.459 | 9      |
|               |            |     |     |     |        |       |        |       |       |                         |                  |        | 183.02 |
|               |            |     |     |     |        |       |        |       |       |                         |                  |        | 4      |

|               |        |    |    |   |        |      |       |       |       |   |   |        |        |
|---------------|--------|----|----|---|--------|------|-------|-------|-------|---|---|--------|--------|
| ZINC40879757  | 406.38 | 7  | 9  | 5 | 145.91 | 1.88 | 0.11  | -0.22 | -0.33 | 0 | 0 | -0.072 | 165.87 |
| ZINC96023826  | 414.4  | 7  | 10 | 6 | 158.30 | 1.83 | -1.24 | -2.14 | -2.02 | 1 | 0 | -2.027 | 166.69 |
| ZINC38321654  | 434.39 | 7  | 12 | 7 | 187.76 | 1.41 | -2.4  | -2.96 | -3.14 | 2 | 0 | -2.956 | 170.92 |
| ZINC72320065  | 460.43 | 7  | 12 | 6 | 184.60 | 2.75 | -2.66 | -2.46 | -3.04 | 2 | 0 | -2.460 | 183.02 |
| ZINC96113204  | 314.38 | 5  | 5  | 0 | 43.82  | 2.98 | 2.02  | 1.84  | 0.98  | 0 | 0 | 2.370  | 136.35 |
| ZINC38321675  | 501.31 | 7  | 11 | 6 | 167.53 | 2.28 | -0.42 | -1.05 | -1.44 | 3 | 0 | -1.046 | 193.10 |
| ZINC95911423  | 472.48 | 8  | 11 | 6 | 167.53 | 2.69 | -0.84 | -1.55 | -1.85 | 2 | 0 | -1.546 | 190.90 |
| ZINC77265897  | 315.37 | 5  | 6  | 0 | 56.71  | 2.68 | 1.28  | 1.23  | 0.34  | 0 | 0 | 1.765  | 135.57 |
| ZINC96269030  | 400.45 | 5  | 6  | 0 | 105.08 | 2.32 | 1.70  | 2.58  | 1.01  | 0 | 0 | 1.882  | 163.56 |
| ZINC142492210 | 356.37 | 7  | 8  | 4 | 125.68 | 2.75 | 0.07  | 0.17  | -0.27 | 0 | 0 | 0.168  | 145.11 |
| ZINC238760037 | 418.39 | 7  | 11 | 7 | 178.53 | 1.57 | -2.90 | -3.33 | -2.92 | 2 | 0 | -3.178 | 165.81 |
| ZINC70455365  | 474.46 | 9  | 12 | 6 | 184.60 | 2.26 | -1.89 | -2.07 | -2.82 | 2 | 0 | -2.069 | 189.38 |
| ZINC96113160  | 382.38 | 6  | 8  | 0 | 43.82  | 2.79 | 3.24  | 4.01  | 2.23  | 0 | 0 | 3.389  | 155.21 |
| ZINC37538901  | 414.4  | 8  | 10 | 5 | 162.98 | 1.74 | 0.43  | 0.03  | -0.62 | 0 | 0 | 0.028  | 166.80 |
| ZINC67912677  | 458.46 | 8  | 11 | 6 | 167.53 | 2.25 | -1.27 | -1.93 | -2.06 | 2 | 0 | -1.934 | 184.53 |
| ZINC95911489  | 428.43 | 10 | 10 | 5 | 155.14 | 2.14 | -0.66 | -1.05 | -1.21 | 0 | 0 | -0.941 | 173.43 |
| ZINC95486141  | 432.38 | 3  | 10 | 7 | 181.05 | 1.59 | 0.52  | 0.09  | -1.61 | 1 | 0 | 0.092  | 173.99 |
| ZINC976902    | 386.47 | 6  | 4  | 0 | 77.38  | 3.62 | 5.97  | 5.71  | 3.52  | 0 | 0 | 5.706  | 167.16 |
| ZINC2103242   | 364.39 | 27 | 3  | 4 | 81.08  | 2.53 | 1.98  | 1.56  | 1.43  | 0 | 0 | 2.474  | 156.50 |
| ZINC514290392 | 367.44 | 27 | 6  | 5 | 87.04  | 1.71 | -0.7  | 1.92  | 1.26  | 0 | 0 | 2.452  | 157.59 |
| Efavirenz     | 315.67 | 1  | 5  | 1 | 38.33  | 2.68 | 4.01  | 4.67  | 3.61  | 0 | 0 | 4.073  | 122.96 |
| Etravirine    | 435.28 | 4  | 5  | 2 | 120.64 | 3.22 | 4.45  | 4.73  | 2.48  | 0 | 0 | 4.717  | 170.10 |
| Rilpivirine   | 366.42 | 5  | 4  | 2 | 97.42  | 3.23 | 4.55  | 4.88  | 2.37  | 0 | 0 | 4.989  | 163.37 |
| Doravirine    | 425.75 | 5  | 8  | 1 | 105.7  | 2.64 | 2.09  | 3.81  | 1.89  | 0 | 0 | 2.655  | 164.89 |

<sup>a</sup>Molecular weight (MW) < 500 Dalton; hydrogen bond donor (HBD) ≤ 5; hydrogen bond acceptor (HBA) ≤ 10; polar surface area (PSA) > 130 Å<sup>2</sup> - the cell membrane permeability is limited.; the octanol–water partition coefficient (logP) < 5

**Table S4. Absorption** parameters for selected NPs and drugs calculated with pkCSM

| Molecule      | Water solubility<br>(log mol/L) | Caco2 permeability<br>(log cm/s)<br>high permeability >0.9 | Caco2 | Human intestinal<br>absorption<br>(% Absorbed)<br>poorly absorbed <30% | Skin Permeability<br>low skin permeability, log Kp>-<br>2.5 | P-<br>glycoprotein<br>substrate | P-glycoprotein I<br>inhibitor | P-glycoprotein II<br>inhibitor |
|---------------|---------------------------------|------------------------------------------------------------|-------|------------------------------------------------------------------------|-------------------------------------------------------------|---------------------------------|-------------------------------|--------------------------------|
| ZINC4340567   | -1.399                          | 1.215                                                      |       | 93.462                                                                 | -2.885                                                      | Yes                             | No                            | No                             |
| ZINC771797    | -2.77                           | 0.869                                                      |       | 91.061                                                                 | -2.647                                                      | No                              | No                            | No                             |
| ZINC142491991 | -1.761                          | 0.429                                                      |       | 57.700                                                                 | -2.737                                                      | Yes                             | No                            | No                             |
| ZINC33975071  | -1.403                          | -0.708                                                     |       | 28.696                                                                 | -2.735                                                      | Yes                             | No                            | No                             |
| ZINC40879757  | -3.437                          | 0.344                                                      |       | 54.471                                                                 | -2.737                                                      | Yes                             | No                            | No                             |
| ZINC96023826  | -1.248                          | -0.721                                                     |       | 29.314                                                                 | -2.737                                                      | No                              | No                            | No                             |
| ZINC38321654  | -2.077                          | -0.602                                                     |       | 21.989                                                                 | -2.735                                                      | Yes                             | No                            | No                             |
| ZINC72320065  | -1.407                          | -0.697                                                     |       | 28.764                                                                 | -2.735                                                      | Yes                             | No                            | No                             |
| ZINC96113204  | -2.509                          | 1.261                                                      |       | 94.231                                                                 | -2.786                                                      | No                              | No                            | No                             |
| ZINC38321675  | -2.696                          | -0.192                                                     |       | 27.117                                                                 | -2.735                                                      | Yes                             | No                            | No                             |
| ZINC95911423  | -1.611                          | -0.806                                                     |       | 31.733                                                                 | -2.736                                                      | Yes                             | No                            | No                             |
| ZINC77265897  | -2.465                          | 1.242                                                      |       | 94.560                                                                 | -2.828                                                      | No                              | No                            | No                             |
| ZINC96269030  | -3.936                          | 1.193                                                      |       | 77.547                                                                 | -2.962                                                      | No                              | Yes                           | Yes                            |
| ZINC142492210 | -1.761                          | 0.429                                                      |       | 57.700                                                                 | -2.737                                                      | Yes                             | No                            | No                             |
| ZINC238760037 | -1.187                          | -0.802                                                     |       | 20.038                                                                 | -2.737                                                      | No                              | No                            | No                             |
| ZINC7455365   | -1.593                          | -0.721                                                     |       | 29.591                                                                 | -2.735                                                      | Yes                             | No                            | No                             |
| ZINC96113160  | -3.307                          | 1.126                                                      |       | 90.763                                                                 | -2.904                                                      | No                              | Yes                           | Yes                            |
| ZINC37538901  | -2.581                          | 0.070                                                      |       | 30.157                                                                 | -2.736                                                      | Yes                             | No                            | No                             |
| ZINC67912677  | -1.535                          | -0.798                                                     |       | 30.908                                                                 | -2.736                                                      | Yes                             | No                            | No                             |
| ZINC95911489  | -2.23                           | 0.064                                                      |       | 43.156                                                                 | -2.748                                                      | Yes                             | No                            | No                             |
| ZINC95486141  | -3.416                          | 0.471                                                      |       | 49.860                                                                 | -2.735                                                      | Yes                             | No                            | No                             |
| ZINC976902    | -5.778                          | 1.070                                                      |       | 95.217                                                                 | -2.731                                                      | No                              | Yes                           | Yes                            |
| ZINC2103242   | -3.686                          | 0.888                                                      |       | 89.213                                                                 | -2.981                                                      | Yes                             | Yes                           | Yes                            |
| ZINC514290392 | -2.892                          | 0.895                                                      |       | 86.189                                                                 | -2.735                                                      | Yes                             | No                            | No                             |
| Efavirenz     | -5.606                          | 1.516                                                      |       | 89.984                                                                 | -3.09                                                       | No                              | Yes                           | No                             |

|             |        |       |        |        |     |     |     |
|-------------|--------|-------|--------|--------|-----|-----|-----|
| Etravirine  | -3.908 | 0.285 | 86.399 | -2.753 | Yes | Yes | Yes |
| Rilpivirine | -4.245 | 0.486 | 93.213 | -2.772 | Yes | Yes | Yes |
| Doravirine  | -3.225 | 0.364 | 82.757 | -2.741 | Yes | No  | No  |

**Table S5. Distribution and Excretion** parameters for selected NPs and drugs calculated with pkCSM

| Molecule      | Human volume of distribution (VDss)                | Human fraction unbound<br>(Fu) | BBB permeability                                                 | CNS permeability                                                        | Total<br>Clearance<br>(log<br>ml/min/kg) | Renal<br>OCT2<br>substrate |
|---------------|----------------------------------------------------|--------------------------------|------------------------------------------------------------------|-------------------------------------------------------------------------|------------------------------------------|----------------------------|
|               | (log L/kg)                                         |                                | (log BB)                                                         | (log PS)                                                                |                                          |                            |
|               | VDss low, logVDss<-0.15<br>VDss high, logVDss>0.45 |                                | readily cross the BBB, logBB>0.3<br>poorly distributed, logBB<-1 | to Penetrate the CNS, logPS>-2<br>unable to penetrate the CNS, logPS<-3 |                                          |                            |
| ZINC4340567   | 0.7                                                | 0.408                          | -0.006                                                           | -2.511                                                                  | 0.814                                    | No                         |
| ZINC771797    | -0.495                                             | 0.211                          | -0.101                                                           | -2.438                                                                  | 0.627                                    | No                         |
| ZINC142491991 | 0.347                                              | 0.540                          | -1.04                                                            | -3.848                                                                  | 1.011                                    | No                         |
| ZINC33975071  | 0.064                                              | 0.541                          | -1.579                                                           | -4.741                                                                  | 0.781                                    | No                         |
| ZINC40879757  | -0.209                                             | 0.209                          | -1.247                                                           | -3.97                                                                   | 0.199                                    | No                         |
| ZINC96023826  | 0.119                                              | 0.611                          | -1.279                                                           | -4.443                                                                  | 0.917                                    | No                         |
| ZINC38321654  | 0.345                                              | 0.541                          | -1.542                                                           | -4.954                                                                  | 0.653                                    | No                         |
| ZINC72320065  | 0.071                                              | 0.539                          | -1.55                                                            | -4.694                                                                  | 0.830                                    | No                         |
| ZINC96113204  | 0.494                                              | 0.491                          | 0.335                                                            | -2.196                                                                  | 0.818                                    | Yes                        |
| ZINC38321675  | -0.439                                             | 0.438                          | -1.707                                                           | -4.876                                                                  | 1.027                                    | No                         |
| ZINC95911423  | 0.024                                              | 0.565                          | -1.433                                                           | -4.487                                                                  | 1.012                                    | No                         |
| ZINC77265897  | 0.24                                               | 0.501                          | -0.030                                                           | -2.836                                                                  | 0.756                                    | No                         |
| ZINC96269030  | -0.537                                             | 0.027                          | -0.713                                                           | -2.550                                                                  | 0.780                                    | No                         |
| ZINC142492210 | 0.347                                              | 0.540                          | -1.04                                                            | -3.848                                                                  | 1.011                                    | No                         |
| ZINC238760037 | 0.062                                              | 0.676                          | -1.39                                                            | -4.746                                                                  | 0.909                                    | No                         |
| ZINC70455365  | 0.03                                               | 0.499                          | -1.612                                                           | -4.656                                                                  | 0.847                                    | No                         |
| ZINC96113160  | 0.323                                              | 0.408                          | 0.214                                                            | -2.053                                                                  | 0.595                                    | No                         |
| ZINC37538901  | -0.444                                             | 0.385                          | -1.438                                                           | -4.049                                                                  | 0.806                                    | No                         |
| ZINC67912677  | 0.022                                              | 0.577                          | -1.410                                                           | -4.546                                                                  | 0.997                                    | No                         |
| ZINC95911489  | -0.399                                             | 0.543                          | -1.363                                                           | -4.173                                                                  | 0.296                                    | No                         |



|               |        |       |        |        |        |     |
|---------------|--------|-------|--------|--------|--------|-----|
| ZINC95486141  | 0.192  | 0.031 | -1.579 | -4.459 | 0.621  | No  |
| ZINC976902    | -0.091 | 0.140 | 0.187  | -1.847 | 0.188  | No  |
| ZINC2103242   | 0.143  | 0.085 | -0.696 | -2.335 | 0.233  | No  |
| ZINC514290392 | -0.095 | 0.377 | -0.931 | -3.508 | 0.412  | Yes |
| Efavirenz     | 0.045  | 0.029 | 0.036  | -1.651 | -0.147 | No  |
| Etravirine    | 0.069  | 0.014 | -0.496 | -1.863 | -0.426 | No  |
| Rilpivirine   | 0.400  | 0     | -0.100 | -1.770 | 0.209  | No  |
| Doravirine    | 0.135  | 0.137 | -1.713 | -2.790 | -0.102 | No  |

**Table S6. Metabolism** parameters for selected NPs and drugs calculated with pkCSM

| Molecule            | CYP2D6 substrate | CYP3A4 substrate | CYP1A2 inhibitor | CYP2C19 inhibitor | CYP2C9 inhibitor | CYP2D6 inhibitor | CYP3A4 inhibitor |
|---------------------|------------------|------------------|------------------|-------------------|------------------|------------------|------------------|
| ZINC4340567         | No               | No               | Yes              | No                | No               | No               | No               |
| ZINC771797          | No               | Yes              | No               | No                | No               | No               | No               |
| ZINC142491991       | No               | No               | No               | No                | No               | No               | No               |
| ZINC33975071        | No               | No               | No               | No                | No               | No               | No               |
| ZINC40879757        | No               | No               | No               | No                | No               | No               | No               |
| ZINC96023826        | No               | No               | No               | No                | No               | No               | No               |
| ZINC38321654        | No               | No               | No               | No                | No               | No               | No               |
| ZINC72320065        | No               | No               | No               | No                | No               | No               | No               |
| <b>ZINC96113204</b> | <b>No</b>        | <b>Yes</b>       | <b>Yes</b>       | <b>No</b>         | <b>No</b>        | <b>Yes</b>       | <b>No</b>        |
| ZINC38321675        | No               | No               | No               | No                | No               | No               | No               |
| ZINC95911423        | No               | No               | No               | No                | No               | No               | No               |
| <b>ZINC77265897</b> | <b>No</b>        | <b>Yes</b>       | <b>Yes</b>       | <b>No</b>         | <b>No</b>        | <b>No</b>        | <b>No</b>        |
| <b>ZINC96269030</b> | <b>No</b>        | <b>Yes</b>       | <b>No</b>        | <b>Yes</b>        | <b>No</b>        | <b>No</b>        | <b>Yes</b>       |
| ZINC142492210       | No               | No               | No               | No                | No               | No               | No               |
| ZINC238760037       | No               | No               | No               | No                | No               | No               | No               |
| ZINC70455365        | No               | No               | No               | No                | No               | No               | No               |
| <b>ZINC96113160</b> | <b>No</b>        | <b>Yes</b>       | <b>Yes</b>       | <b>No</b>         | <b>No</b>        | <b>Yes</b>       | <b>No</b>        |

|                    |           |            |            |            |            |           |            |
|--------------------|-----------|------------|------------|------------|------------|-----------|------------|
| ZINC37538901       | No        | No         | No         | No         | No         | No        | No         |
| ZINC67912677       | No        | No         | No         | No         | No         | No        | No         |
| ZINC95911489       | No        | No         | No         | No         | No         | No        | No         |
| ZINC95486141       | No        | No         | No         | No         | No         | No        | No         |
| <b>ZINC976902</b>  | <b>No</b> | <b>Yes</b> | <b>Yes</b> | <b>Yes</b> | <b>Yes</b> | <b>No</b> | <b>Yes</b> |
| <b>ZINC2103242</b> | <b>No</b> | <b>Yes</b> | <b>No</b>  | <b>Yes</b> | <b>No</b>  | <b>No</b> | <b>Yes</b> |
| ZINC514290392      | No        | No         | No         | No         | No         | No        | No         |
| Efavirenz          | No        | Yes        | No         | Yes        | Yes        | No        | No         |
| Etravirine         | No        | Yes        | Yes        | Yes        | Yes        | No        | Yes        |
| Rilpivirine        | No        | Yes        | Yes        | Yes        | Yes        | No        | Yes        |
| Doravirine         | No        | No         | Yes        | Yes        | No         | No        | Yes        |

**Table S7. Toxicity** parameters for selected NPs and drugs calculated with pkCSM

| Molecule             | AMES toxicity <sup>a</sup> | Max. Human tolerated Dose <sup>b</sup> (log mg/kg/day)<br>Toxic effect>0.477 log mg/kg/day | hERG I inhibitor <sup>c</sup> | hERG II inhibitor <sup>d</sup> | Oral Rat Acute Toxicity <sup>e</sup> (LD50) (mol/kg) | Oral Rat Chronic Toxicity <sup>f</sup> (LOAEL) (log mg/kg_bw/day) | Hepatotoxicity <sup>g</sup> | Skin Sensitization <sup>h</sup> | T.Pyiformis toxicity <sup>i</sup> (log ug/L) | Minnow toxicity <sup>j</sup> (log mM) |
|----------------------|----------------------------|--------------------------------------------------------------------------------------------|-------------------------------|--------------------------------|------------------------------------------------------|-------------------------------------------------------------------|-----------------------------|---------------------------------|----------------------------------------------|---------------------------------------|
| ZINC4340567          | Yes                        | 0.175                                                                                      | No                            | No                             | 2.305                                                | 2.372                                                             | No                          | No                              | 0.810                                        | 1.711                                 |
| <b>ZINC771797</b>    | No                         | 0.424                                                                                      | No                            | No                             | 2.206                                                | 2.22                                                              | No                          | No                              | 0.557                                        | 0.545                                 |
| <b>ZINC142491991</b> | No                         | 0.077                                                                                      | No                            | No                             | 2.149                                                | 3.286                                                             | No                          | No                              | 0.285                                        | 2.077                                 |
| <b>ZINC33975071</b>  | No                         | 0.036                                                                                      | No                            | No                             | 2.895                                                | 3.866                                                             | No                          | No                              | 0.285                                        | 7.149                                 |
| ZINC40879757         | No                         | 0.606                                                                                      | No                            | No                             | 2.410                                                | 3.757                                                             | No                          | No                              | 0.285                                        | 1.954                                 |
| <b>ZINC96023826</b>  | No                         | 0.138                                                                                      | No                            | No                             | 2.825                                                | 3.896                                                             | No                          | No                              | 0.285                                        | 5.374                                 |
| <b>ZINC38321654</b>  | No                         | 0.22                                                                                       | No                            | No                             | 2.774                                                | 3.808                                                             | No                          | No                              | 0.285                                        | 7.359                                 |
| ZINC72320065         | No                         | 0.014                                                                                      | No                            | No                             | 2.906                                                | 3.873                                                             | No                          | No                              | 0.285                                        | 7.197                                 |
| ZINC96113204         | No                         | -0.171                                                                                     | No                            | Yes                            | 3.212                                                | 1.198                                                             | Yes                         | No                              | 0.332                                        | 1.398                                 |
| <b>ZINC38321675</b>  | No                         | 0.254                                                                                      | No                            | No                             | 3.432                                                | 3.717                                                             | No                          | No                              | 0.285                                        | 5.452                                 |
| <b>ZINC95911423</b>  | No                         | -0.028                                                                                     | No                            | No                             | 2.905                                                | 3.818                                                             | No                          | No                              | 0.285                                        | 5.951                                 |

|                      |     |        |    |     |       |       |     |    |       |        |
|----------------------|-----|--------|----|-----|-------|-------|-----|----|-------|--------|
| ZINC77265897         | No  | 0.054  | No | Yes | 3.197 | 1.179 | Yes | No | 0.313 | 1.904  |
| ZINC96269030         | No  | 0.106  | No | No  | 1.984 | 1.481 | Yes | No | 0.795 | 1.259  |
| <b>ZINC142492210</b> | No  | 0.077  | No | No  | 2.149 | 3.286 | No  | No | 0.285 | 2.077  |
| <b>ZINC238760037</b> | No  | 0.255  | No | No  | 2.735 | 3.933 | No  | No | 0.285 | 6.071  |
| ZINC70455365         | No  | -0.082 | No | Yes | 2.976 | 3.997 | No  | No | 0.285 | 6.848  |
| ZINC96113160         | No  | -0.212 | No | Yes | 3.452 | 1.03  | Yes | No | 0.356 | 1.307  |
| <b>ZINC37538901</b>  | No  | 0.276  | No | No  | 2.273 | 3.281 | No  | No | 0.285 | 0.757  |
| <b>ZINC67912677</b>  | No  | 0.018  | No | No  | 2.865 | 3.856 | No  | No | 0.285 | 6.068  |
| ZINC95911489         | No  | 0.746  | No | No  | 2.214 | 3.088 | No  | No | 0.285 | 4.315  |
| ZINC95486141         | No  | 0.93   | No | Yes | 3.007 | 3.18  | No  | No | 0.285 | 3.977  |
| ZINC976902           | Yes | 0.852  | No | Yes | 2.663 | 0.992 | Yes | No | 0.294 | -4.961 |
| <b>ZINC2103242</b>   | No  | -0.558 | No | Yes | 1.941 | 1.785 | No  | No | 0.516 | 1.513  |
| <b>ZINC514290392</b> | No  | 0.439  | No | No  | 2.482 | 2.185 | No  | No | 0.285 | 1.307  |
| <b>Efavirenz</b>     | No  | -0.429 | No | No  | 3.035 | 1.4   | Yes | No | 1.924 | 0.439  |
| <b>Etravirine</b>    | No  | 0.006  | No | Yes | 2.783 | 0.701 | Yes | No | 0.320 | 0.986  |
| <b>Rilpivirine</b>   | No  | -0.196 | No | Yes | 2.588 | 0.731 | Yes | No | 0.472 | 1.194  |
| <b>Doravirine</b>    | No  | 0.578  | No | No  | 2.502 | 2.094 | Yes | No | 0.307 | 2.853  |

<sup>a</sup>A compound with a positive values of AMES mutagenicity test is mutagenic and therefore may act as a carcinogen; A hERG <sup>b</sup>I/<sup>c</sup>II inhibitors could cause the development of the acquired long QT syndrome, which leads to fatal ventricular arrhythmia; <sup>d</sup>A compound with positive tests could be associated with disrupted normal function of the liver; <sup>e</sup>A compound with positive tests could have a high potential adverse effect for products applied to the skin, e.g. cosmetics and antifungals; <sup>m</sup>measured in log mg/kg/day. If value is  $\leq 0.477$  log mg/kg/day is considered to be low, while  $> 0.477$  log mg/kg/day is considered to be high; <sup>s</sup>measured in mol/kg. <sup>h</sup>measured in log mg/kg\_bw/day; <sup>i</sup>measured in log  $\mu$ g/L. If value is  $< -0.5$  log  $\mu$ g/L is considered to be toxic; <sup>j</sup>measured in log mM. If log LC50 values  $< -0.3$  indicate high acute toxicity

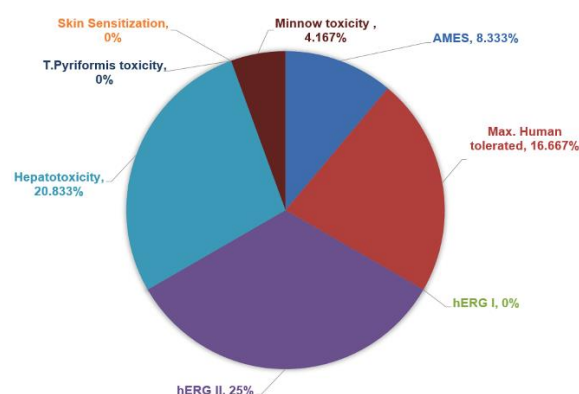

**Figure S3.** Pie chart representation of the alerts distribution for selected NPs

**Table S8.** Approved drugs, ZINC NPs and their predicted antiviral activity (IC<sub>50</sub> and procent inhibition) against HIV-1 RT using HIVprotI online platform (bioinfo.imtech.res.in/manojk/hivproti/)

| Name                | inhibition, % | Predicted IC <sub>50</sub> , $\mu$ M |
|---------------------|---------------|--------------------------------------|
| Doravirine          | 45.47         | 31.34                                |
| <b>ZINC2103242</b>  | <b>52.47</b>  | <b>35.58</b>                         |
| ZINC514290392       | 49.43         | 30.85                                |
| Etravirine          | 50.51         | 43.51                                |
| ZINC142491991       | 49.98         | 47.4                                 |
| ZINC142492210       | 39.12         | 47.4                                 |
| ZINC238760037       | 46.4          | 18.97                                |
| ZINC33975071        | 43.63         | 18.92                                |
| <b>ZINC37538901</b> | <b>47.74</b>  | <b>21.48</b>                         |
| <b>ZINC38321654</b> | <b>41.55</b>  | <b>25.59</b>                         |
| ZINC38321675        | 37.96         | 16.91                                |
| ZINC40879757        | 50.58         | 26.23                                |
| <b>ZINC67912677</b> | <b>27.65</b>  | <b>13.26</b>                         |
| ZINC70455365        | 43.55         | 18.87                                |
| ZINC72320065        | 42.42         | 24.63                                |
| ZINC95486141        | 45.87         | 50.99                                |
| ZINC95911423        | 39.84         | 13.15                                |
| ZINC95911489        | 40.16         | 28.78                                |
| ZINC96023826        | 48.48         | 30.57                                |
| ZINC96113160        | 47.74         | 31.34                                |
| ZINC96113204        | 49.93         | 14.02                                |
| ZINC96269030        | 38.97         | 38.92                                |
| Efavirenz           | 50.5          | -                                    |
| ZINC4340567         | 49.29         | 2                                    |
| ZINC771797          | 44.23         | 99.86                                |
| Rilpivirine         | 50.46         | 31.83                                |

|              |       |       |
|--------------|-------|-------|
| ZINC77265897 | 39.12 | 37.74 |
| ZINC976902   | 46.45 | 38.07 |

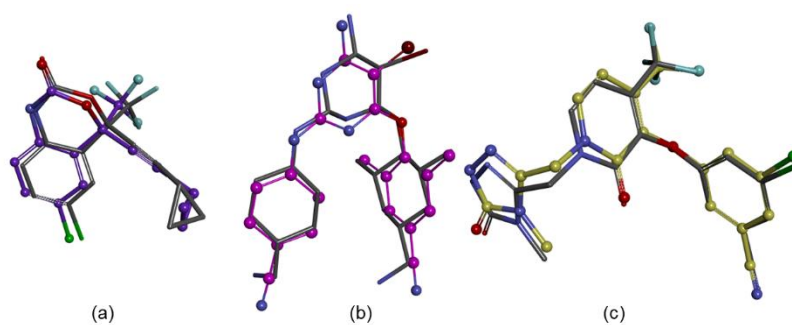

**Figure S4.** Efavirenz (RX-purple; the docked pose–grey)(a), Etravirine (RX-magenta; the docked pose –grey) (b), and Doravirine (RX-yellow; the docked pose–grey) (c)

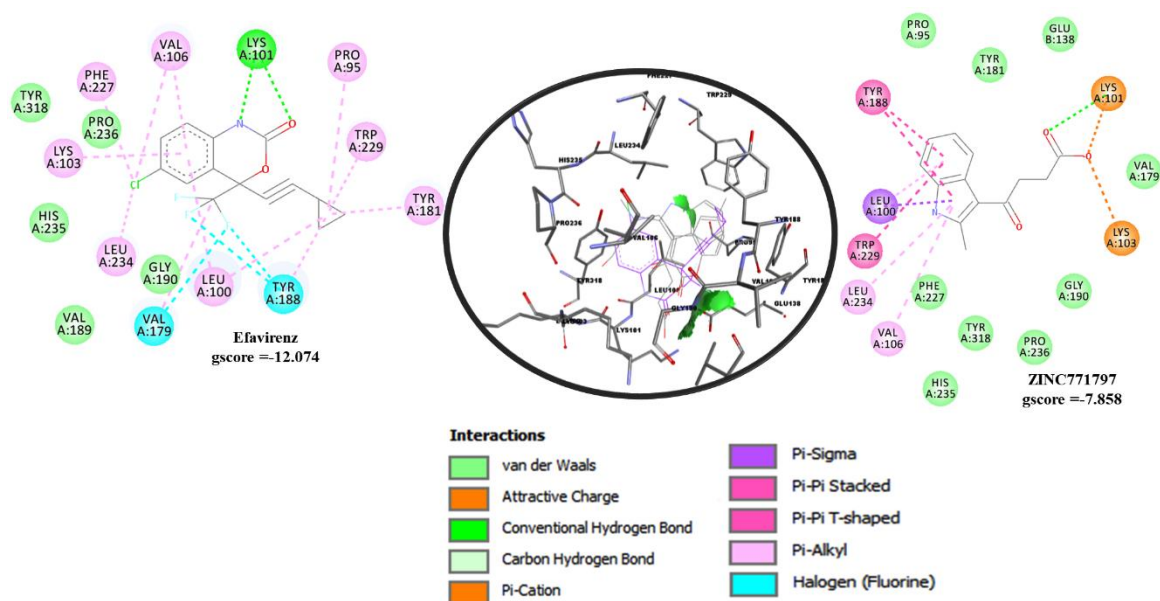

**Figure S5.** The selected docked NP (non-toxic) in the 1FK9 binding site – efavrinez and ZINC771797 (2D presentation); in the circle, the efavrinez (purple) and the selected NPs in 1FK9 are presented (3D variant); the green color indicates de hydrogen bonding area

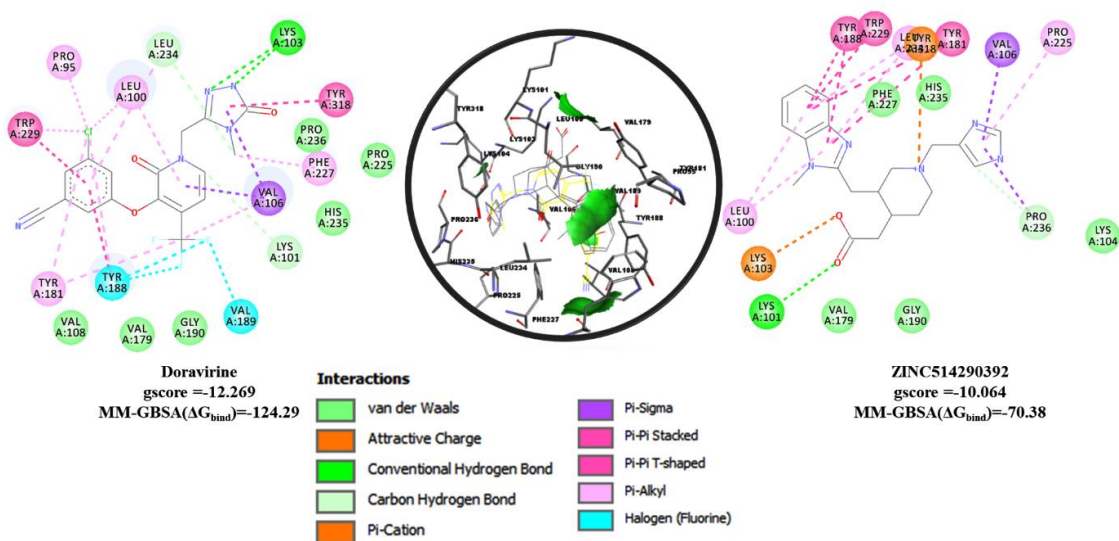

**Figure S6.** The selected docked NP in the 4NCG binding site – doravirine and ZINC514290392 - 2D presentation); in the circle, the doravirine (yellow) and the selected NPs in 4NCG are presented (3D variant); the green color indicates de hydrogen bonding area

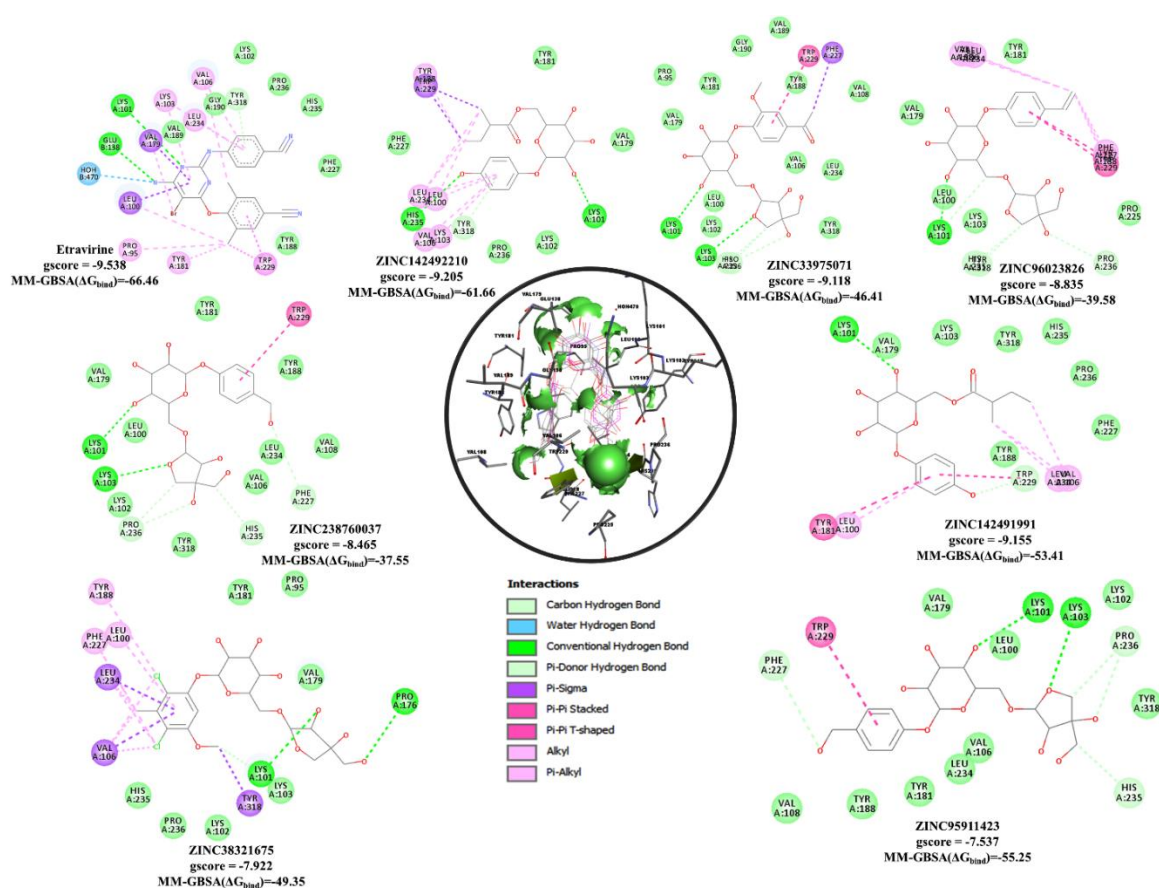

**Figure S7.** The selected docked NP (non-toxic) in the 3MEC binding site (2D presentation); in the circle, the etravirine (magenta) and the selected NPs in 3MEC are presented (3D variant); the green color indicates de hydrogen bonding area; MM-GBSA( $\Delta G_{\text{bind}}$ ) is expressed in kcal/mol

**Table S9.** Docked interaction analysis of selected NPs with target proteins 3MEC and 4NCG

|              | Bonds<br>length in Å | Category                                            | Type                        | Active site residues | NP:Atoms         |
|--------------|----------------------|-----------------------------------------------------|-----------------------------|----------------------|------------------|
| ZINC37538901 | 2.745                | Water Hydrogen Bond;<br>Conventional Hydrogen Bond  | Hydrogen Bond               | B:HOH470:O           | ZINC37538901:O21 |
|              | 2.763                | Conventional Hydrogen Bond                          | Hydrogen Bond               | A:TYR188:O           | ZINC37538901:O25 |
|              | 2.657                | Conventional Hydrogen Bond                          | Hydrogen Bond               | A:LYS101:N           | ZINC37538901:O21 |
|              | 2.801                | Conventional Hydrogen Bond                          | Hydrogen Bond               | A:LYS101:NZ          | ZINC37538901:O20 |
|              | 2.958                | Conventional Hydrogen Bond                          | Hydrogen Bond               | A:TYR181:N           | ZINC37538901:O25 |
|              | 3.625                | Pi-Sigma                                            | Hydrophobic                 | A:VAL106:CG2         | ZINC37538901     |
|              | 3.835                | Pi-Sigma                                            | Hydrophobic                 | A:LEU234:CD1         | ZINC37538901     |
|              | 3.089                | Salt Bridge                                         | Hydrogen Bond;Electrostatic | A:LYS103:NZ          | ZINC37538901:O24 |
|              | 4.331                | Attractive Charge                                   | Electrostatic               | A:LYS101:NZ          | ZINC37538901:O24 |
|              | 4.630                | Alkyl                                               | Hydrophobic                 | A:LYS103             | ZINC37538901:C14 |
|              | 5.405                | Alkyl                                               | Hydrophobic                 | A:VAL106             | ZINC37538901:C14 |
|              | 4.641                | Alkyl                                               | Hydrophobic                 | A:LEU234             | ZINC37538901:C15 |
|              | 4.557                | Alkyl                                               | Hydrophobic                 | A:VAL106             | ZINC37538901:C16 |
|              | 4.785                | Alkyl                                               | Hydrophobic                 | A:LEU234             | ZINC37538901:C16 |
|              | 5.043                | Pi-Alkyl                                            | Hydrophobic                 | A:TYR188             | ZINC37538901:C15 |
|              | 5.406                | Pi-Alkyl                                            | Hydrophobic                 | A:TYR188             | ZINC37538901:C16 |
|              | 4.537                | Pi-Alkyl                                            | Hydrophobic                 | A:PHE227             | ZINC37538901:C16 |
|              | 4.122                | Pi-Alkyl                                            | Hydrophobic                 | A:TRP229             | ZINC37538901:C15 |
|              | 4.786                | Pi-Alkyl                                            | Hydrophobic                 | A:TRP229             | ZINC37538901:C15 |
|              | 4.347                | Pi-Alkyl                                            | Hydrophobic                 | A:TYR318             | ZINC37538901:C14 |
| ZINC38321654 | 3.328                | Water Hydrogen Bond;Conven-<br>tional Hydrogen Bond | Hydrogen Bond               | B:HOH470:O           | ZINC38321654:O23 |
|              | 2.704                | Conventional Hydrogen Bond                          | Hydrogen Bond               | A:LYS101:N           | ZINC38321654:O23 |
|              | 3.305                | Conventional Hydrogen Bond                          | Hydrogen Bond               | A:LYS103:N           | ZINC38321654:O25 |
|              | 2.816                | Conventional Hydrogen Bond                          | Hydrogen Bond               | A:TYR318:OH          | ZINC38321654:O26 |
|              | 2.694                | Conventional Hydrogen Bond                          | Hydrogen Bond               | B:GLU138:OE1         | ZINC38321654:O22 |
|              | 3.120                | Conventional Hydrogen Bond                          | Hydrogen Bond               | A:PRO236:O           | ZINC38321654:O25 |
|              | 2.445                | Conventional Hydrogen Bond                          | Hydrogen Bond               | A:HIS235:O           | ZINC38321654:O26 |
|              | 3.164                | Carbon Hydrogen Bond                                | Hydrogen Bond               | A:LYS101:O           | ZINC38321654:C17 |
|              | 4.029                | Pi-Donor Hydrogen Bond                              | Hydrogen Bond               | A:TYR318             | ZINC38321654:O25 |
|              | 3.259                | Pi-Sigma                                            | Hydrophobic                 | A:TRP229             | ZINC38321654:C16 |
|              | 5.374                | Pi-Pi T-shaped                                      | Hydrophobic                 | A:TRP229             | ZINC38321654     |
|              | 5.925                | Pi-Pi T-shaped                                      | Hydrophobic                 | A:TRP229             | ZINC38321654     |
|              | 5.424                | Pi-Alkyl                                            | Hydrophobic                 | A:VAL106             | ZINC38321654     |

|              |       |                                                |                        |              |                  |
|--------------|-------|------------------------------------------------|------------------------|--------------|------------------|
| ZINC67912677 | 3.158 | Water Hydrogen Bond;Conventional Hydrogen Bond | Hydrogen Bond          | B:HOH470:O   | ZINC67912677:O27 |
|              | 2.893 | Conventional Hydrogen Bond                     | Hydrogen Bond          | A:LYS101:N   | ZINC67912677:O27 |
|              | 2.783 | Conventional Hydrogen Bond                     | Hydrogen Bond          | A:LYS103:N   | ZINC67912677:O28 |
|              | 2.643 | Conventional Hydrogen Bond                     | Hydrogen Bond          | A:HIS235:O   | ZINC67912677:O25 |
|              | 2.706 | Conventional Hydrogen Bond                     | Hydrogen Bond          | B:GLU138:OE1 | ZINC67912677:O26 |
|              | 2.686 | Conventional Hydrogen Bond                     | Hydrogen Bond          | A:LYS101:O   | ZINC67912677:O28 |
|              | 3.248 | Conventional Hydrogen Bond                     | Hydrogen Bond          | A:PRO236:O   | ZINC67912677:O28 |
|              | 3.878 | Pi-Donor Hydrogen Bond                         | Hydrogen Bond          | A:TYR318     | ZINC67912677:O28 |
|              | 3.446 | Pi-Sigma                                       | Hydrophobic            | A:TRP229     | ZINC67912677:C3  |
|              | 3.639 | Pi-Sigma                                       | Hydrophobic            | A:TYR181     | ZINC67912677:C19 |
|              | 3.840 | Pi-Sigma                                       | Hydrophobic            | A:TRP229     | ZINC67912677:C19 |
|              | 4.779 | Pi-Pi Stacked                                  | Hydrophobic            | A:TYR188     | ZINC67912677     |
|              | 4.820 | Pi-Pi T-shaped                                 | Hydrophobic            | A:TRP229     | ZINC67912677     |
|              | 5.462 | Pi-Pi T-shaped                                 | Hydrophobic            | A:TRP229     | ZINC67912677     |
|              | 4.231 | Alkyl                                          | Hydrophobic            | A:VAL106     | ZINC67912677:C7  |
|              | 4.411 | Alkyl                                          | Hydrophobic            | A:VAL108     | ZINC67912677:C7  |
|              | 3.135 | Pi-Alkyl                                       | Hydrophobic            | A:PHE227     | ZINC67912677:C7  |
| ZINC2103242  | 3.125 | Conventional Hydrogen Bond                     | Hydrogen Bond          | A:TRP229     | ZINC2103242:O26  |
|              | 2.906 | Hydrogen Bond                                  | Carbon Hydrogen Bond   | A:LYS101:O   | ZINC2103242:C18  |
|              | 3.871 | Hydrogen Bond                                  | Pi-Donor Hydrogen Bond | A:TRP229     | ZINC2103242:O26  |
|              | 3.557 | Hydrophobic                                    | Pi-Sigma               | A:PRO236:CA  | ZINC2103242      |
|              | 5.890 | Hydrophobic                                    | Pi-Pi Stacked          | A:TYR318     | ZINC2103242      |
|              | 4.039 | Hydrophobic                                    | Pi-Pi Stacked          | A:TYR188     | ZINC2103242      |
|              | 5.334 | Hydrophobic                                    | Pi-Pi T-shaped         | A:TRP229     | ZINC2103242      |
|              | 5.020 | Hydrophobic                                    | Pi-Pi T-shaped         | A:TRP229     | ZINC2103242      |
|              | 4.844 | Hydrophobic                                    | Alkyl                  | A:LEU100     | ZINC2103242      |
|              | 4.645 | Hydrophobic                                    | Alkyl                  | A:VAL106     | ZINC2103242      |
|              | 4.186 | Hydrophobic                                    | Pi-Alkyl               | A:VAL106     | ZINC2103242      |
|              | 5.077 | Hydrophobic                                    | Pi-Alkyl               | A:PRO225     | ZINC2103242      |
|              | 5.383 | Hydrophobic                                    | Pi-Alkyl               | A:LEU100     | ZINC2103242      |
|              | 4.735 | Hydrophobic                                    | Pi-Alkyl               | A:LEU234     | ZINC2103242      |
|              | 4.849 | Hydrophobic                                    | Pi-Alkyl               | A:TYR181     | ZINC2103242      |
